1 *Magnitude of Needle Stick and Sharp Injuries and Associated Factors among Health Care*  
2 *Workers in Werabe Comprehensive Specialized Hospital, Southwest Ethiopia: A Cross-Sectional*  
3 *study*

4 Jemal Halil <sup>1</sup>, Negalign Berhanu <sup>2</sup>, Zeleke Dutamo <sup>\*3</sup>

5 1. Silte district Health Department , Silte District, Southwest Ethiopia

6 2. Department of health services management, Institute of Health , Jimma University, Ethiopia

7 3. Department of reproductive health, School of Public health, College of medicine and Health  
8 Sciences, Wachemo University, Ethiopia

9 \*Corresponding author

10 E-mail: [zeledutamo@gmail.com](mailto:zeledutamo@gmail.com)

11 Tel: +251 910489741

12 ORCID ID: <https://orcid.org/0000-0001-9564-7285>

13 PO BOX: 667, Wachemo University

14

15

16

17

18

19

20

21

22

23

24 **ABSTRACT**

25 **Background:** Needle-stick and sharp injuries were one of major leading risk factor for blood and  
26 body fluid born infections among health care workers (HCWs)

27 **Objective:** To assess the magnitude of occupational needle-stick and sharp injuries and associated  
28 factors among HCWs in Werabe Comprehensive Specialized Hospital (WCSH), Southwest Ethiopia

29 **Methods:** Facility based cross-sectional study was conducted at WCSH from 15 to 25 August, 2020.  
30 Stratified random sampling was used to select 213 HCWs in the Hospital. A self-administered  
31 questionnaire was employed to collect data. After proportional allocation to the professionals, simple  
32 random sampling was used for each stratum. Data was entered and analyzed by using Epi info  
33 version 7 and SPSS version 22, respectively. Odds ratio was used to assess the statistical association  
34 between outcome and independent variables in bivariate and multivariate logistic regression.  
35 Significance of statistical association was tested using 95% confidence interval (CI) and P-value  
36 (<0.05)

37 **Result:** 28.40% of HCWs encountered needle-stick and sharp injuries in the last 1-year. HCWs who  
38 had job related stress, whose working hours was more than 8 hours per day and didn't apply  
39 universal precaution were 8.6, 7.5 and 2.3 times more likely to encounter needle-stick and sharp  
40 injuries, respectively. HCWS with educational status above Diploma level were 90% less likely to  
41 face needle-stick and sharp injuries than their counterparts

42 **Conclusion and recommendation:** The prevalence of occupational needle- stick and sharp injury  
43 was high compared to earlier studies. Educational status of diploma and above, average working  
44 hour for more than eight hours per day, not-applying universal precautions and job related stresses  
45 were factors associated with occupational needle-stick and sharp injures. Refreshment training on  
46 universal precaution and minimizing the excess working hours per day among HCWs were crucial to  
47 decrease the risk of needle stick and sharp injuries

48 **Keywords:** HCWs, needle-stick, sharp injuries, WCSH

## 49 **Introduction**

50 Occupational needle stick and sharp injury refers to any injuries caused by medical set up sharp  
51 instruments that can cause scratch, cut or deep penetration to body parts during day to day  
52 activities in health care setting[1]. Needle stick and sharp injuries were one of the occupational  
53 hazards that can lead health care workers (HCWs) to different infectious diseases, including more  
54 than 20 viral infections [2]. The commonest infections, that could be transmitted through needle-  
55 stick and sharp injuries are hepatitis B (HBV) & hepatitis C (HCV) and the human  
56 immunodeficiency virus (HIV)[3]

57 According to center for communicable disease control and prevention (CDC) estimate, 62% to  
58 88 % of needle stick and sharps injuries in the hospital setting could be prevented by eliminating  
59 unnecessary injections, implementing universal precautions, eliminating needle recapping,  
60 provision and use of personal protective equipment, and training workers in the risk prevention  
61 [4, 5]

62 Each year, study reports in Africa, particularly Sub-Saharan including Ethiopia, indicated that  
63 large proportion of health care workers were exposed for occupational sharp injuries[6-9]

64 In Ethiopia, occupational needle-stick and sharp injury is still remain a challenge among HCWs,  
65 despite different efforts has been made by the government and non-government organizations on  
66 the implementation of safety. Very few studies were conducted to estimate the magnitude and  
67 associated factors of occupational needle stick and sharp injuries in Ethiopia [5, 9, 10]

68 So far, no study showed the magnitude and associated factors of occupational needle stick and  
69 sharp injuries in study area. Understanding of the magnitude and factors affecting the occurrence  
70 of occupational needle stick and sharp injuries enable NSI reduction; create safe working  
71 environment and provision of quality health care provision [11]. Therefore, this study tried to  
72 identify the magnitude and associated factors occupational needle stick and sharp injuries among  
73 health care workers in the study setting

74

75

## 76 **Methods**

### 77 **Study design and setting**

78 A facility based cross-sectional study design was employed. Study was conducted in Werabe  
79 comprehensive specialized Hospital. The hospital is found in Werabe town. It is an  
80 administrative capital of Siltie zone and located 172 km to the south of the country's capital,  
81 Addis Ababa. The town has total population of 74,183. It has three urban and six semi urban  
82 administrative units (kebeles<sup>a</sup>). Werabe Comprehensive Specialized Hospital is a tertiary level  
83 hospital established in 2014, which was expected to serve 3.5-5 million populations and has a  
84 total of 800 beds. It provides a secondary and tertiary level of care and used as referral center for  
85 primary and general hospitals in the district and neighboring districts. A total of 700 employees  
86 were serving in different disciplines in the hospital. Out of 700 employees, 514 were HCWs  
87 including nurses (182), physicians (81), midwives (56), laboratory technicians (45), cleaners (68),  
88 anesthetists (8), public health officers (10), psychiatry (9) and environmental health (6)  
89 professionals

### 90 **Sample size and Sampling procedure**

91 Sample size was determined using single population formula considering 5% margin of  
92 error( $d=0.05$ ), 95%( $z_{\alpha/2}= 1.96$ ) confidence level of certainty and 42% ( $p$ ), proportion  
93 prevalence of needle stick and sharp injury conducted among HCWs in Arba Minch Referral  
94 Hospital, Southern Ethiopia and 10% of non-response rate by using formula

$$95 \quad n_i = (Z_{\alpha/2})^2 * p(1-p) / d^2 = (1.96) \times (1.96) \times (.42)(.48) / (.05)(.05)$$

$$96 \quad = 309.78$$

97 Since our source population 514 is smaller than 10,000, we used correction formula to obtain  
98 final sample size, i.e.  $n_f = n_i / (1 + n_i/N) = 309.78 / (1 + 309.78/514) = 193.29 \times 10\%$  (non-response  
99 rate)  $= 212.62 \approx 213$

100 Hence, the sample size was 213

101 Stratified random sampling was used to select HCWs in the Hospital. HCWs were grouped into  
102 six main strata based on their occupation as nurses, midwives, physicians, medical-laboratory

103 technicians, cleaners and others (anesthetists, public health officers psychiatry and environmental  
104 health professionals). The required sample size for each stratum was determined by using  
105 proportionate allocation to the strata. Study participants from each professional category were  
106 selected by simple random sampling using lottery method (see Figure 1)

### 107 **Data collection tool and procedure**

108 Data were collected by using structured self-administered questionnaire. The questionnaire was  
109 adapted by reviewing different literatures [5, 9]. Data were collected by three Diploma nurses.  
110 Questionnaire was first prepared in English and then translated into Amharic (working language)  
111 by a team containing language experts and health professionals. The Amharic version of the tool  
112 was retranslated into English in order to check consistency. In order to ensure data quality, two  
113 days training was provided to data collectors and supervisor. Pretest was conducted among 11  
114 HCWs found in Kibet Primary Hospital. Close supportive supervision and assistance for data  
115 collectors was employed during data collection

### 116 **Ethical approval and consent to participate**

117 Ethical clearance was obtained from Ethical Review Board of College of Medicine and Health  
118 Science, Wachemo University. An official letter of permission was obtained from Silte Zone  
119 Health department. Study participants were well informed on study purpose and the right to  
120 whether or not participate in the study. Full oral and written consent was obtained from all study  
121 participants. In order to maintain confidentiality of the study participants, anonymity of some  
122 personal identification were considered in the questionnaire

### 123 **Data processing and analysis**

124 We entered data into Epi INFO version 7 statistical packages and analyzed by statistical  
125 Package for Social Sciences (SPSS) version 20. Study participants' response to occupational  
126 needle-stick and sharp injuries status in the past 12months (outcome variable) was coded as  
127 "yes" and "No". The Hosmer and Lemshow goodness of fit test was carried out and showed a p-  
128 value of 0.72 which indicated the model was adequate. Bivariate analysis was carried out using  
129 binary logistic regression analysis. Independent variables that had a p-value  $\leq 0.25$  in the Bi-  
130 variate analysis were included in the multivariable logistic regression model. A backward

131 stepwise logistic regression analysis was carried out to control confounder for the predictor  
132 variable. The strength of association of predictor variables was assessed using adjusted odds ratio  
133 (AOR) and P- value <0.05 at 95% CI was considered statistically significant

## 134 **Result**

### 135 **Socio demographic characteristics of the respondents**

136 From a total of 213 HCWs, 204(95.8%) responded the questionnaire. One hundred nine (53.4%)  
137 of the study participants were females and the rest were males. One hundred thirty one(64.2%) of  
138 the study participants were in the age group of 25-29 years and the mean age of the study  
139 participants was 27.4(SD = ±3.9) years. Regarding to the marital status of the respondents, about  
140 half (51%) of the study participants were married. One hundred seventy one (83.3%) were  
141 Muslims by religion. One hundred twenty three (60.3%) of the study subjects were first degree  
142 and above in their educational status. The majority (68.0%) of the HCWs have less than five  
143 years of service. HCWs participated in the study had served in the hospital three and half years.  
144 Eighty one (39.9%) and forty three (21.1%) of the study participants were nurses and cleaners by  
145 profession, respectively (see Table1)

### 146 **Work environment related characteristics of study participants**

147 From the total 204 respondents, one hundred thirty seven (67.2%) had not receive on the job  
148 training on infection perfection. The majority, 170 (83%) of the participants reported that there  
149 was a safety or universal precaution guidelines in their working place. One hundred thirty four  
150 (65.7%) of the respondents had received supportive supervision from concerned body on  
151 implementation of infection prevention and safety principles. One hundred seventy nine (87.7%)  
152 of the study participants reported that personal protective equipment were adequately provided  
153 by the hospital. More than half (55.4%) of the study participants experienced stressful situation  
154 related with their work or working environment. One hundred forty three (70.3%) of the study  
155 participants reported that, they were working for eight or less than eight hours per day and sixty  
156 one (29.7%) were working for more than eight hours per day (see Table 2)

### 157 **Prevalence of occupational needle-stick and sharp injuries**

158 In this study, the prevalence of occupational needle-stick and sharp injuries was 28.4% (95% CI:  
159 22.1-34.8). From the study participants who experienced needle-stick and sharp injuries, the  
160 majority (72%) did not report the incidence of the injuries to the concerned body

### 161 **Medical instruments causing needle-stick and sharp injuries**

162 The main causes for needle-stick and sharp injuries were injection-needle (53.1%) and IV  
163 Cannula (17.2%). Moreover, 16% and 15% of the injuries were caused by surgical blade and  
164 suturing needles, respectively (see figure 2)

165 Among HCWs, about 41% and 30% of needle-stick and sharp injuries occurred during injection  
166 and sample collection procedure and medical waste handling, respectively (See figure 3)

167 Regarding with the working departments of the health care workers, 23%, 17% and 14% of all  
168 injuries occurred at maternity ward, emergency and outpatient department, respectively

### 169 **Factors associated with occupational needle-stick and sharp injuries**

170 Educational status, average daily working hour, PPE use frequently and job related stress were  
171 significantly associated with occupational needle-stick and sharp injuries. HCWs with  
172 educational level of Diploma and above were 90% less likely to be injured than HCWs with  
173 educational level of 12<sup>th</sup> grade and below (AOR 0.1, 95%CI 0.1, 0.5). Healthcare workers who  
174 worked for more than 8 hours per day had an almost 9-fold increase in risk of getting  
175 occupational needle-stick and sharp injuries than those who worked for eight and less hours in  
176 daily basis (AOR 7.5, 95% CI 3.8, 20.5). The study revealed that work related stress was one of  
177 the predictor of occurrence of occupational needle-stick and sharp injuries. The odd of injuries  
178 was about 5.6 times higher among stressed HCWs (AOR 5.6, 95% CI 2.4, 13.1) than who were  
179 not stressed. Inconsistent use of PPE increased the occurrence of occupational needle-stick and  
180 sharp injuries. HCWs who did not frequently use PPE in the last 12 months were about 2.4 times  
181 more likely to experience occupational needle-stick and sharp injuries (AOR 2.4, 95%CI 1.1,  
182 5.4) than those who were frequently used PPE (see table 3)

183

184

## 185 **DISCUSSION**

186 The result of this study revealed that the prevalence of occupational needle-stick and sharp  
187 injuries among HCWs in the last twelve months was 28.4%. The prevalence was higher when  
188 compared to study done in Saudi Arabia, Bale zone hospitals and Awi Zone, Ethiopia, where the  
189 prevalence was 6.4%, 19.4 and 18.7% respectively [10, 12, 13]. However, this finding was lower  
190 when compared to studies conducted in Tanzania, Nepal and Iran where the prevalence of  
191 occupational needle-stick and sharp injuries were 48.6%, 48.0% and 32.3% respectively [8, 14,  
192 15]. The possible reasons for the difference could be access to use of advanced medical  
193 technologies and the length of the year at which studies were conducted. The type of HCWs  
194 participated in the studies may also increase or decrease needle-stick and sharp injuries  
195 prevalence

196 The current, study revealed that there was a significant association between educational level and  
197 occurrence of needle-stick and sharp injuries. HCWs with educational level of diploma and  
198 above were by 90% less likely experience needle-stick and sharp injuries than HCWs with  
199 educational level of grade 12<sup>th</sup> and below. But, This finding differs from a previous study done in  
200 in Hawassa referral Hospital (Ethiopia), where HCWs with educational level of below diploma  
201 had less odds of injuries [16]. The possible justification might be as educational level of HCWs  
202 increased better practice of safety measures. The other reason could be less attention was given  
203 on work place supervision and on job training for those HCWs with lower educational level.

204 In this study statistical analysis showed that significant association between occurrence of sharp  
205 injuries and average daily working hour of the health care workers. HCWs who worked for  
206 more than eight hours were about 7.5 times exposed for occupational needle-stick and sharp  
207 injuries than those who worked for less than 8 hours on average in daily bases. This is in line  
208 with previous studies done in Iran, Addis Ababa (Ethiopia), Debrebrihan (Ethiopia) and Dessie  
209 (Ethiopia), where increased risk of sharp injuries occurred among HCWs who worked for more  
210 than 40 hours compared to HCWs worked less than 40 hours per week [17-20]. This implies that  
211 as the health care workers works for extended hour, they might experience a fatigue. This leads  
212 them less to adhere for safety protocols and might expose them for occupational sharp injuries.



213 In this study health care workers those who wet used personal protective equipment (PPE) like  
214 gloves during procedure were 2 times more likely at risk of getting sharp injury than their  
215 counterparts. This is in line with previous study done in Wolita zone public health facilities  
216 (Ethiopia) and Dessie town, northern Ethiopia [19, 20].inconsistent use of PPE during routine  
217 work by HCWs might be under estimation of the infection transmission by sharp instrument

218 Stressed HCWs were 5.6 times at risk of getting needle-stick and sharp injuries than who were  
219 not stressed. This is in line with previous studies done East Gojam zone, Ethiopia and Awi zone  
220 health institutions in north Ethiopia[12, 21]. This can be explained as HCWs who were stressed  
221 they become nervous, aggressive and might lose the ability of concentration during procedures.  
222 This might lead them to commit procedural errors. As a result they may expose themselves for  
223 preventable needle-stick and sharp injuries

224 **Conclusion:** The result of this study showed that the prevalence of occupational needle-stick and  
225 sharp injuries was high. Educational status of diploma and above, working hour extended for  
226 more than 8 hours per day, not applying universal precautions and job related stress were  
227 predictors of occupational sharp injures. Refreshment training on universal precaution and  
228 minimizing the excess working hours per day among HCWs were crucial to decrease the risk of  
229 needle stick and sharp injuries

### 230 **End note**

231 <sup>a</sup> smallest administrative unit in Ethiopia

### 232 **Competing interests**

233 The authors declare that there is no competing interest

### 234 **Availability of data**

235 Data set used and analyzed in this study available from the corresponding author and obtained  
236 based on reasonable request.

### 237 **Abbreviations and Acronyms**

238 GP: General practitioner, HBV: Hepatitis B Virus, HCV: Hepatitis C Virus, HCW: Health care  
239 workers, HIV: Human immune deficiency virus, PPE: Personal protective equipment,

## 240 **Author contributions**

241 JH took the lead role in conception, design, analysis and write up of the manuscript. ZD & NB  
242 involved in drafting the research proposal, analysis and write up of the manuscript. All authors  
243 read and approved the final manuscript.

## 244 **Acknowledgement**

245 We would like to thank Silte District Health Department for financial support of the research  
246 undertaking. Also we would like to thank all respondents for their willingness to participate in  
247 the study.

## 248 **Funding**

249 This work was financially supported by Silte District Health Department, Southwest Ethiopia

## 250 **References**

- 251 1. Texas Department of State Health Services, I.D.C.U., *Contaminated*  
252 *Sharps Injuries Among Healthcare Workers in Texas: 2012.*>. 2012.
- 253 2. Annette Prüss, Ü.E. Rapiti, and Y. Hutin, <*Global burden of disease from sharps injuries*  
254 *to health-care workers*>. Environmental Burden of Disease Series, No. 3, 2003.
- 255 3. SUSAN Q. WILBURN and G. EIJKEMANS, *Preventing Needlestick Injuries among*  
256 *Healthcare Workers*. INT J OCCUP ENVIRON HEALTH 2004, 2004. **10**: p. 451-456.
- 257 4. (NIOSH)., N.i.f.o.h.a.s., *Needle sticks injuries among employees at a retail pharmacy*  
258 *chain. Health hazard evaluation report: By MA de Perio, OH: U.S. Department of Health*  
259 *and Human Services, Centers for Disease Control and Prevention*. 2012: p. 0063-3154.
- 260 5. Bazie, G.W., *Factors Associated with Needle Stick and Sharp Injuries Among Healthcare*  
261 *Workers in North East Ethiopia*. Risk Manag Healthc Policy, 2020. **13**: p. 2449-2456.
- 262 6. Ghosh, T., *Occupational Health and Hazards among Health Care Workers*. International  
263 *Journal of Occupational Safety and Healt*, 2013. **3**(1): p. 1-4.
- 264 7. Mariusz Goniewicz, et al., *Injuries caused by sharp instruments among healthcare*  
265 *workers – international and Polish perspectives*. Annals of Agricultural and  
266 *Environmental Medicine*, 2012. **19**(3): p. 523-527.

- 267 8. PHILLIPO L. CHALYA, et al., *Needle-stick injuries and splash exposures among*  
268 *health-care workers at a tertiary care hospital in north-western Tanzania*. Tanzania  
269 *Journal of Health Research*, 2015. **17**(2).
- 270 9. Tadesse, M., M. Meskele, and A.T. Boltena, *Needle-stick and Sharps Injuries among*  
271 *Health Care Workers in Wolaita Zone, Southern Ethiopia*. *Medical Safety & Global*  
272 *Health*, 2016. **05**(02).
- 273 10. Bekele1, T., et al., *Factors Associated with Occupational Needle Stick and Sharps*  
274 *Injuries among Hospital Healthcare Workers in Bale Zone, Southeast Ethiopia*. *PLoS*  
275 *ONE*, 2015. **10**(10).
- 276 11. Bouya, S., et al., *Global Prevalence and Device Related Causes of Needle Stick Injuries*  
277 *among Health Care Workers: A Systematic Review and Meta-Analysis*. *Ann Glob Health*,  
278 2020. **86**(1): p. 35.
- 279 12. Abebe Dilie, Desalegn Amare, and Tenaw Gualu, *Occupational Exposure to Needle Stick*  
280 *and Sharp Injuries and Associated Factors among Health Care Workers in Awi Zone,*  
281 *Amhara Regional State, Northwest Ethiopia*. *Journal of Environmental and Public*  
282 *Health*, 2017. **2017**.
- 283 13. Elsherbeny EE and N. NA, *Incidences of needle stick and sharps injuries among health*  
284 *care workers in a tertiary hospital, Saudi Arabia*. *Egyptian Journal of Occupational*  
285 *Medicine*, 2018. **42**(2): p. 271-284
- 286 14. Lotfabadi, P., et al., *Risk Factors of Needlestick and Sharps Injuries among Healthcare*  
287 *Workers*. *International Journal of Hospital Research* 2013. **2**(1).
- 288 15. Sayami M and T. J, *Needle Sticks Injuries among Health Care Professionals in Tertiary*  
289 *Hospital*. *Journal of Institute of Medicine*, 2013. **35**(3): p. 48-55.
- 290 16. Gudeta Kaweti and T. Abegaz, *Prevalence of percutaneous injuries and associated*  
291 *factors among health care workers in Hawassa referral and adare District hospitals,*  
292 *Hawassa, Ethiopia* *BMC Public Health*, 2014. **16**(8).
- 293 17. Feleke, B.E., *Prevalence and determinant factors for sharp injuries among Addis Ababa*  
294 *hospitals health professionals* *Science Journal of Public Health*, 2013. **1**(5).
- 295 18. Habtewold, F.A.T.a.T.D., *Assessment of Prevalence and Determinants of Occupational*  
296 *Exposure to HIV Infection among Healthcare Workers in Selected Health Institutions in*

- 297            *Debre Berhan Town, North Shoa Zone, Amhara Region, Ethiopia*. Hindawi Publishing  
298            Corporation AIDS Research and Treatment, 2014. **2014**.
- 299    19.    Kebede, A. and H. Gerensea, *Prevalence of needle stick injury and its associated factors*  
300            *among nurses working in public hospitals of Dessie town, Northeast Ethiopia*. BMC Res  
301            Notes, 2018. **11**.
- 302    20.    Motaarefi, H., et al., *Factors Associated with Needlestick Injuries in Health Care*  
303            *Occupations: A Systematic Review*. Journal of Clinical and Diagnostic Research, 2016.  
304            **10(8)**.
- 305    21.    Aderaw, Z., *Assessment on Magnitude of Needle Stick and Sharp Injuries and Associated*  
306            *Factors among Health Care Workers in East Gojjam Zone Health Institutions, Amahara*  
307            *Regional State, Ethiopia*. obal Journal of Medical research Diseases, 2013. **13(3)**.
- 308

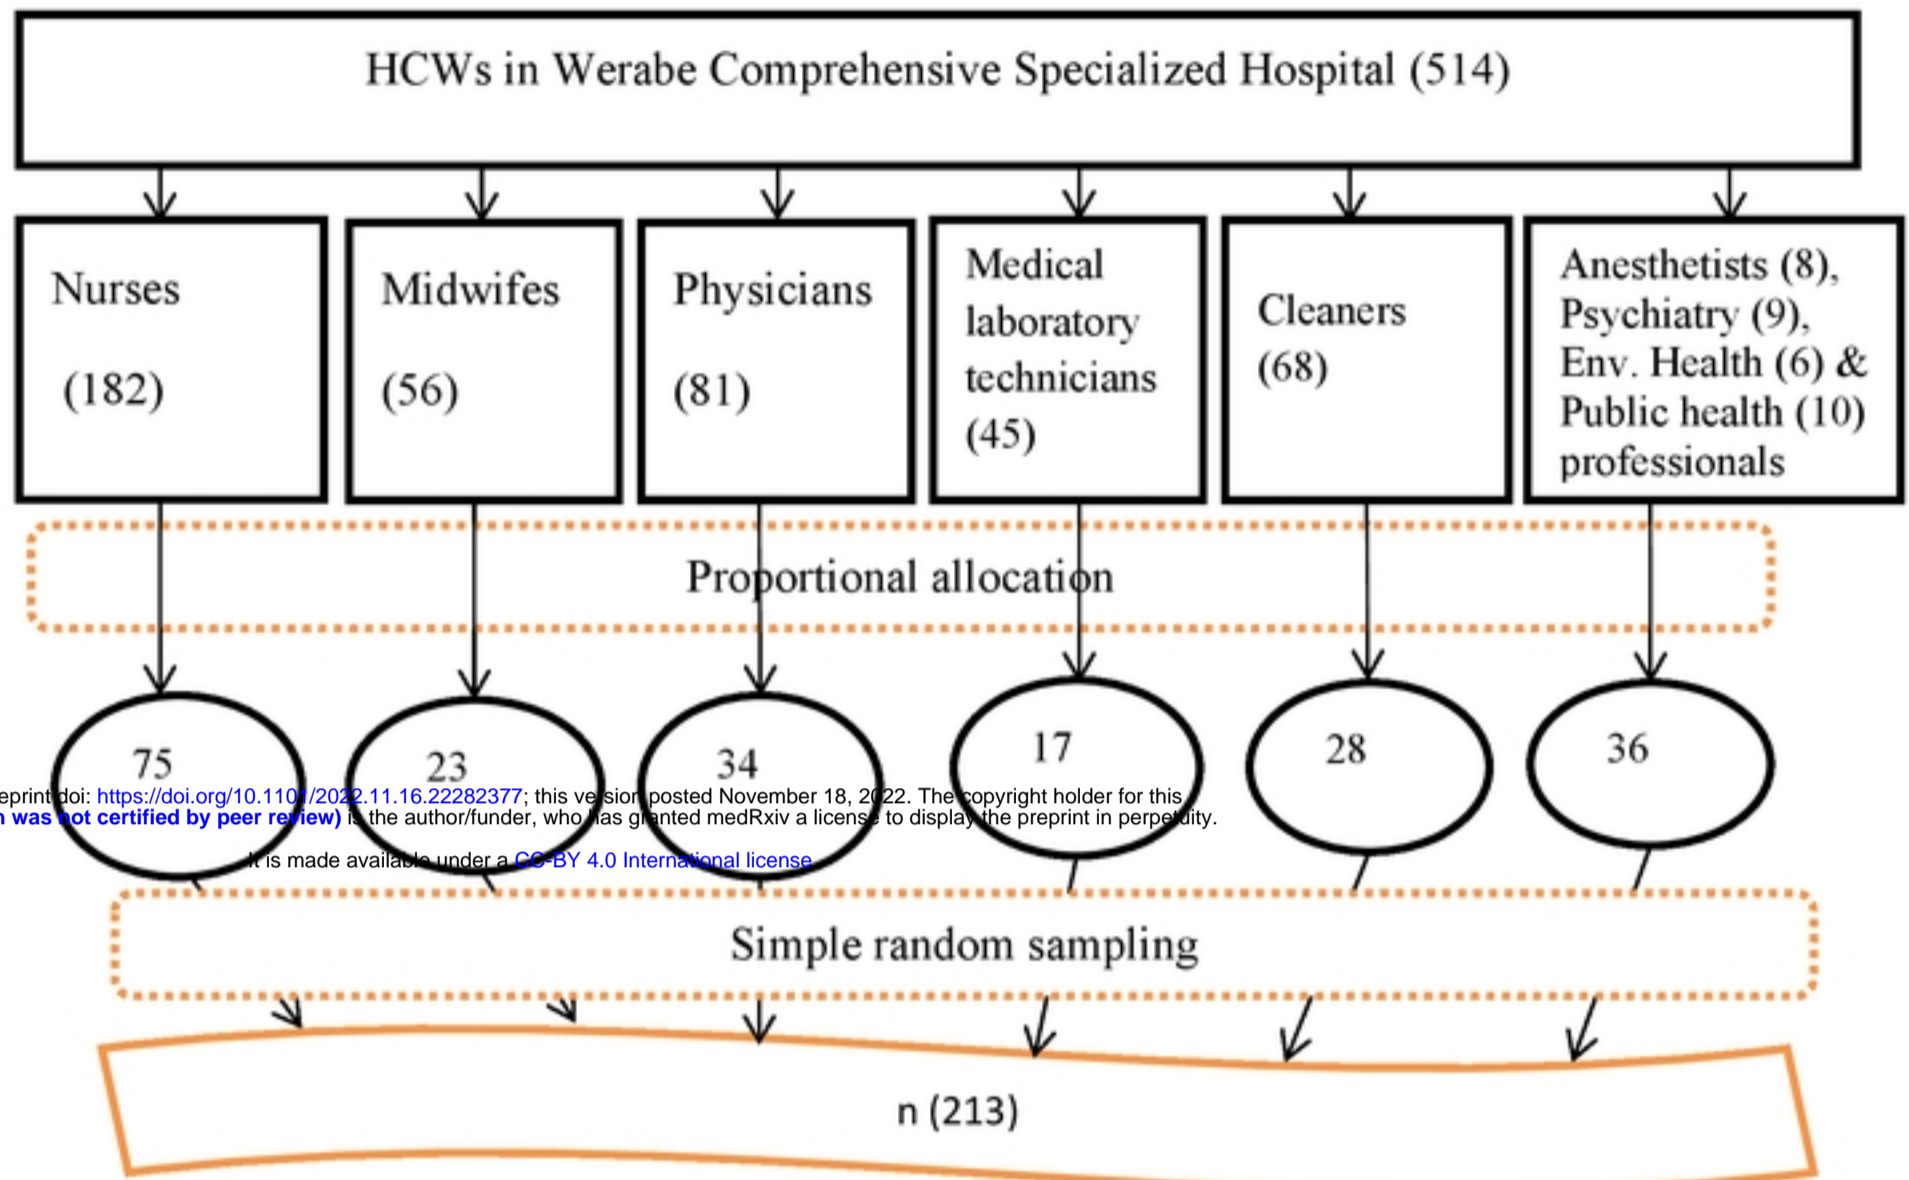

medRxiv preprint doi: <https://doi.org/10.1101/2022.11.16.22282377>; this version posted November 18, 2022. The copyright holder for this preprint (which was not certified by peer review) is the author/funder, who has granted medRxiv a license to display the preprint in perpetuity. It is made available under a [CC-BY 4.0 International license](https://creativecommons.org/licenses/by/4.0/).

Figure 1 Schematic representation of sampling procedure to select HCWs in WCSH, Werabe, Southwest, Ethiopia, June, 2020

medRxiv preprint doi: <https://doi.org/10.1101/2022.11.16.22282377>; this version posted November 18, 2022. The copyright holder for this preprint (which was not certified by peer review) is the author/funder, who has granted medRxiv a license to display the preprint in perpetuity. It is made available under a [CC-BY 4.0 International license](https://creativecommons.org/licenses/by/4.0/).

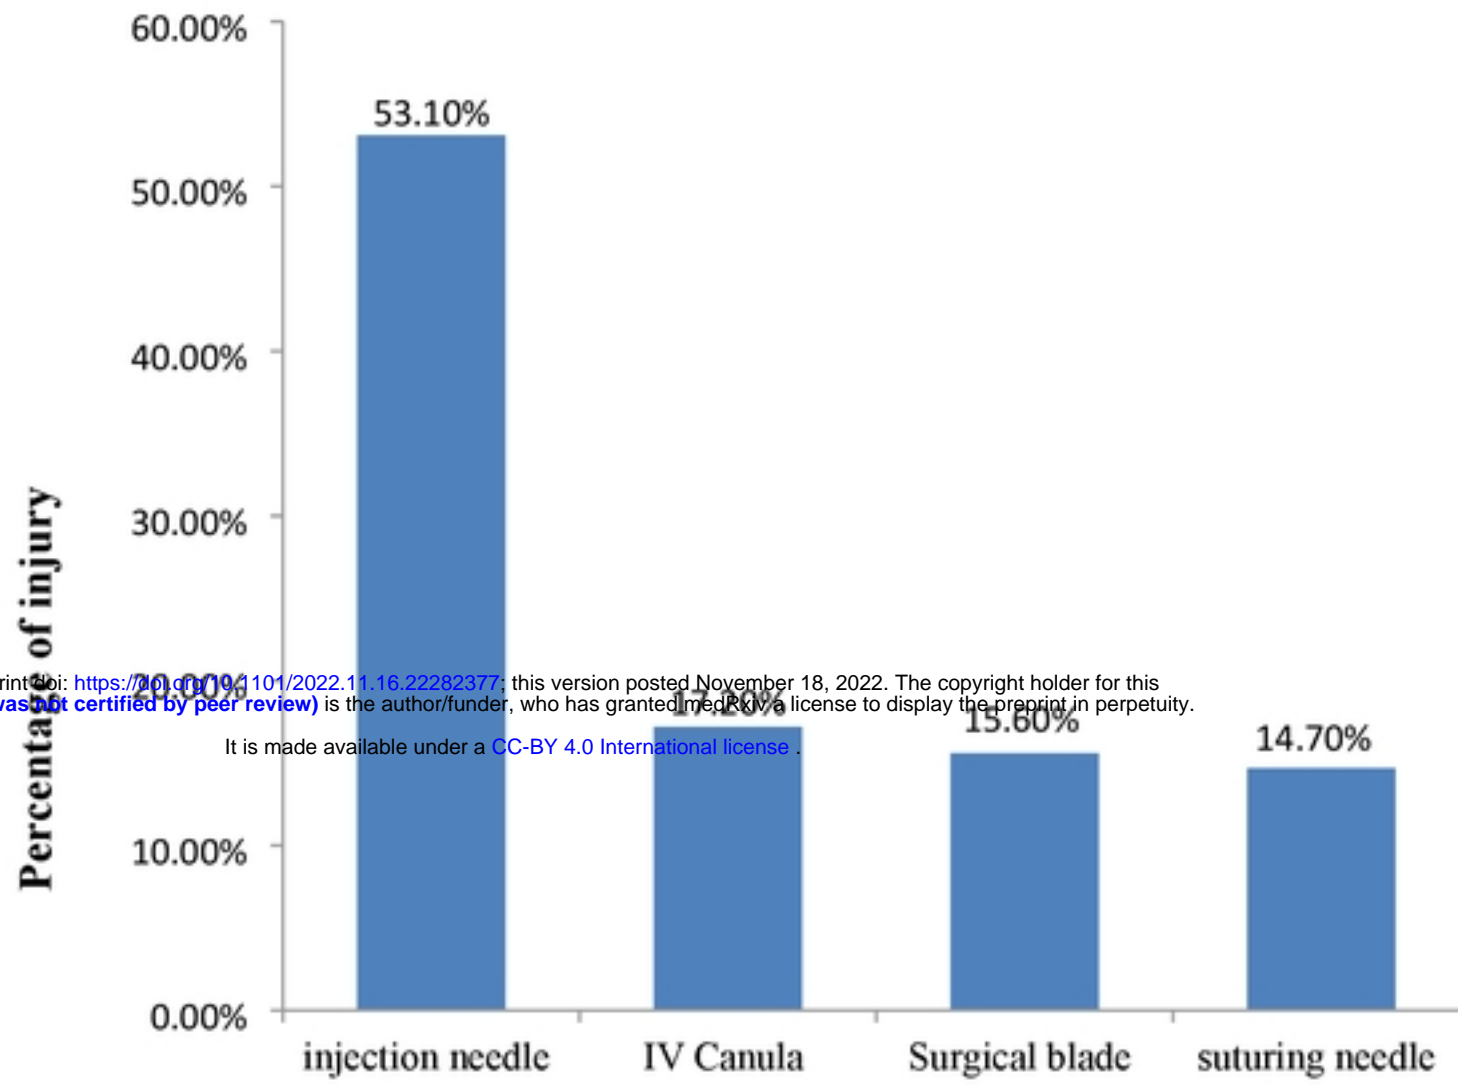

Figure 2 Medical instruments commonly causing needle –stick and sharp injuries among HCWs at WCSH, Werabe, Southwest Ethiopia, June, 2020

Figure 2 reasons why sharp injuries occurred among study participants at werabe comprehensive specialized hospital, June, 2020.

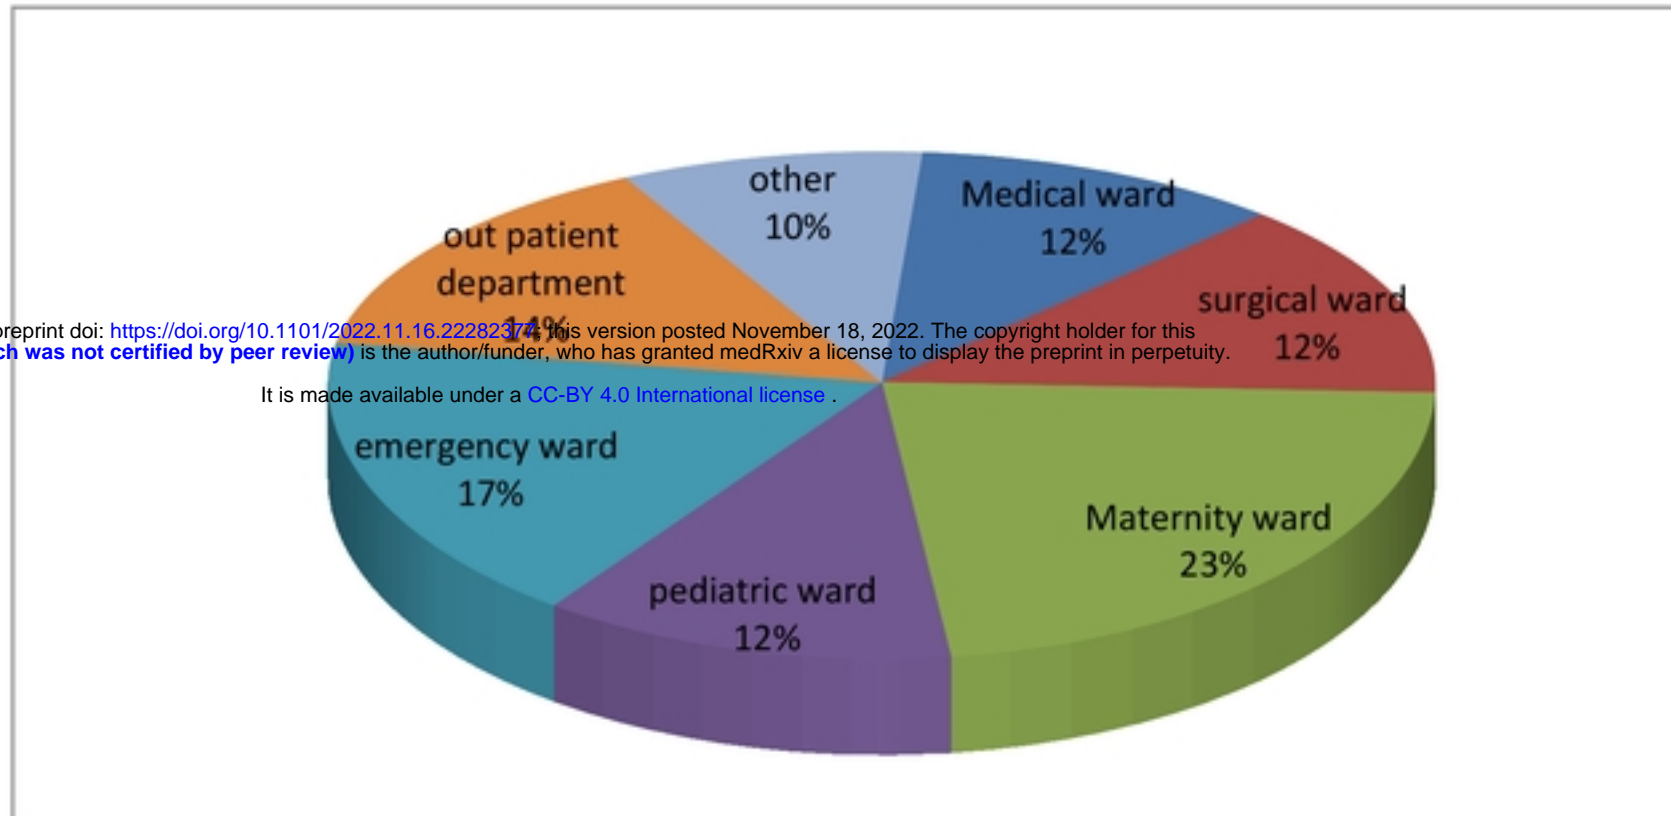

medRxiv preprint doi: <https://doi.org/10.1101/2022.11.16.22282374>; this version posted November 18, 2022. The copyright holder for this preprint (which was not certified by peer review) is the author/funder, who has granted medRxiv a license to display the preprint in perpetuity. It is made available under a [CC-BY 4.0 International license](https://creativecommons.org/licenses/by/4.0/).

Figure 3 Percentage of occupational sharp injury among HCWs by their working department at werabe comprehensive specialized hospital, June, 2020.

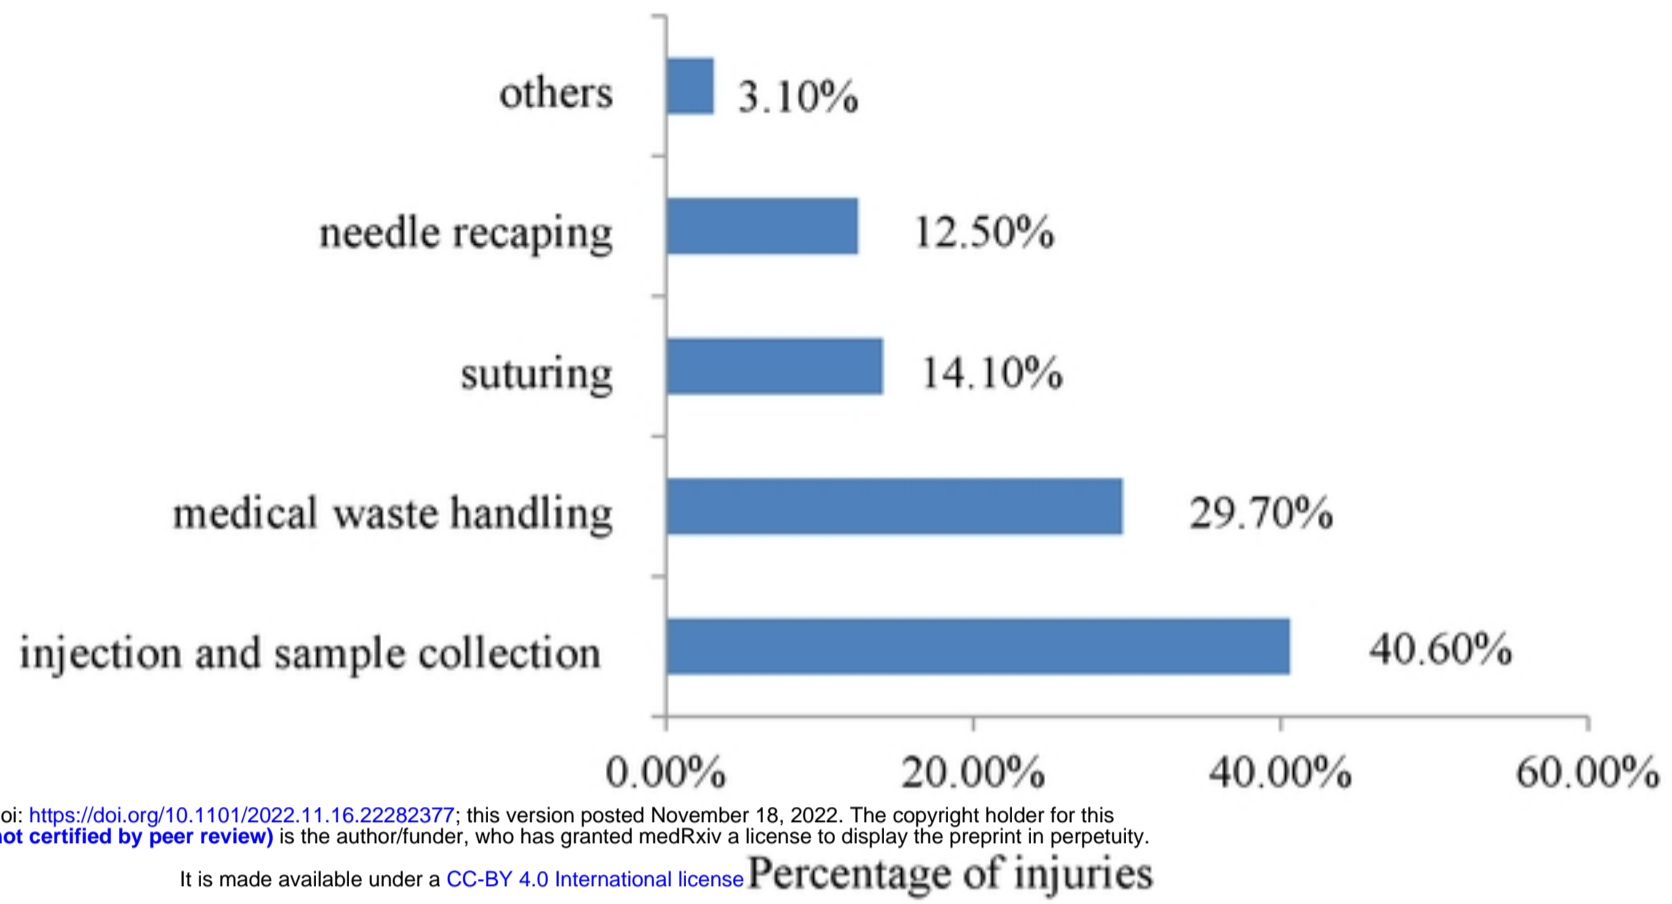

Figure 3 timeline when needle-stick and sharp injuries occurred among study participants at WCSH, Werabe, Southwest Ethiopia, June, 2020
